# Supplementary material
Source: PubMed Central journal article supplement (PMC3340191)
Supplement: supp_M112.346924_jbc.M112.346924-1.pdf [file supp_M112.346924_jbc.M112.346924-1.pdf]

**Table S1. Assignment of signals in 9VdO <sup>1</sup>H-<sup>13</sup>C HMQC**

| <b>Residue</b> | <b>H1</b> | <b>H2</b> | <b>H3</b> | <b>H4</b>         | <b>H5</b>       | <b>H6a</b> | <b>H6b</b> |
|----------------|-----------|-----------|-----------|-------------------|-----------------|------------|------------|
| $\alpha$ Glc   | 5.45      | 3.53      | 3.81      | 3.59 <sup>a</sup> | NA <sup>b</sup> | NA         | NA         |
|                | 100.67    | 74.22     | 76.61     | 80.93             | NA              | NA         | NA         |
| $\alpha$ GlcUA | 5.09      | 3.65      | 4.01      | 3.78              | 4.23/24         | -          | -          |
|                | 97.41     | 73.97     | 76.10     | 74.24             | 75.23           | -          | -          |
| $\alpha$ Gal   | 5.30      | 3.96      | 3.83      | 4.17              | NA              | 3.75       | NA         |
|                | 102.70    | 79.35     | 73.34     | 73.91             | NA              | 64.27      | NA         |
| $\beta$ ManNAc | 4.88      | 4.61      | 3.92      | 3.75              | 3.46            | 3.89/.91   | 3.79/.80   |
|                | 102.13    | 55.64     | 69.54     | 79.63             | 79.13           | 63.13      | 63.05/.12  |
| $\beta$ Glc    | 4.46      | 3.34      | 3.64      | 3.65              | 3.51            | 3.83       | 3.69/.67   |
|                | 105.18    | 75.68     | 76.59     | 81.64             | 77.27           | 62.29      | 62.95/3.0  |

<sup>a</sup>Dark gray highlight denotes residues involved in glycosidic linkages; <sup>b</sup> NA, not assigned
