# Supplementary material
Source: PubMed Central journal article supplement (PMC3340191)
Supplement: supp_M112.346924_jbc.M112.346924-2.pdf [file supp_M112.346924_jbc.M112.346924-2.pdf]

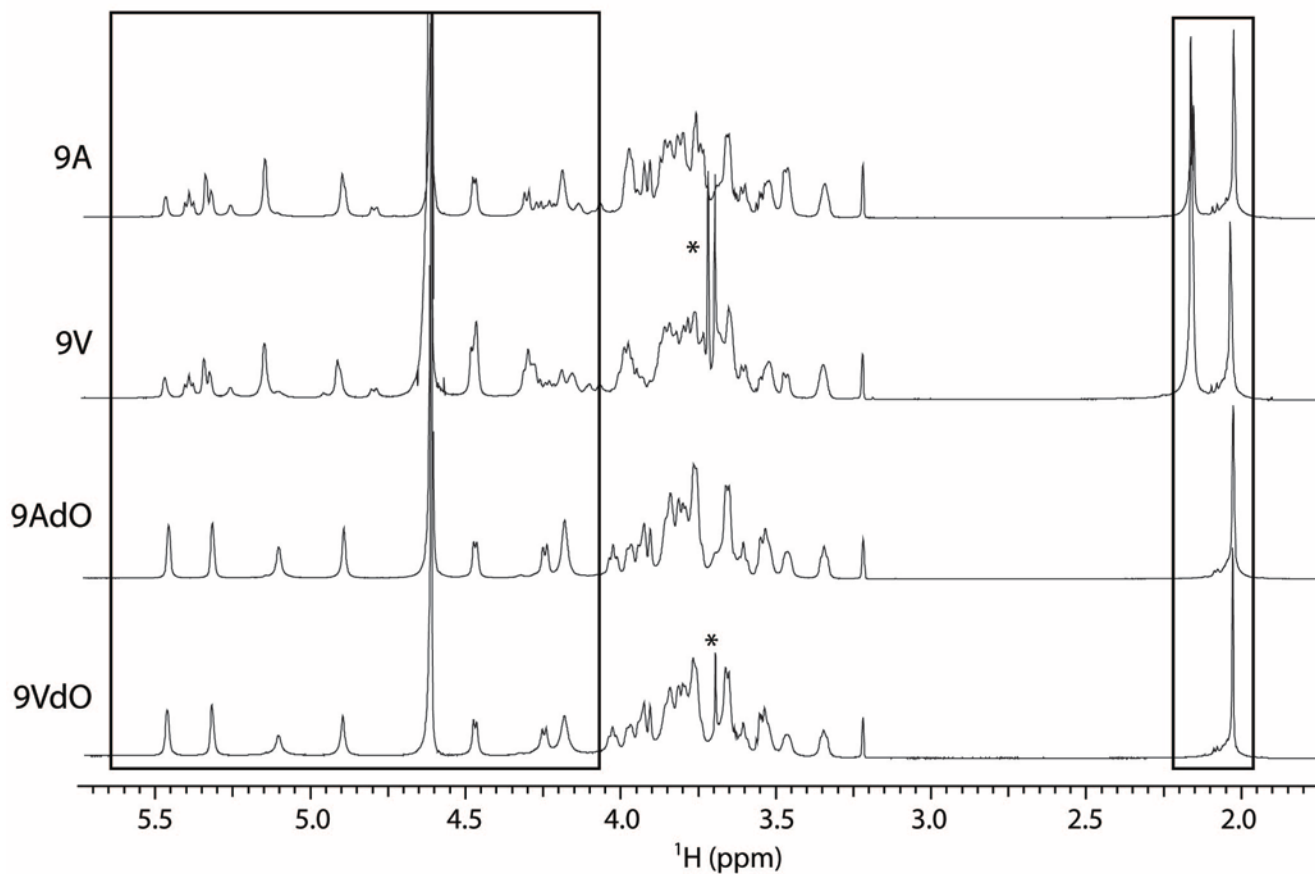

**Figure S1.**  $^1\text{H}$  NMR spectra of native and de-O-acetylated (dO) 9V and 9A PS. Boxed regions are represented in figure 2A and 2B. Asterisks denote signals resulting from trace amounts of Tris.
