# Supplementary material
Source: PubMed Central journal article supplement (PMC3340191)
Supplement: supp_M112.346924_jbc.M112.346924-3.pdf [file supp_M112.346924_jbc.M112.346924-3.pdf]

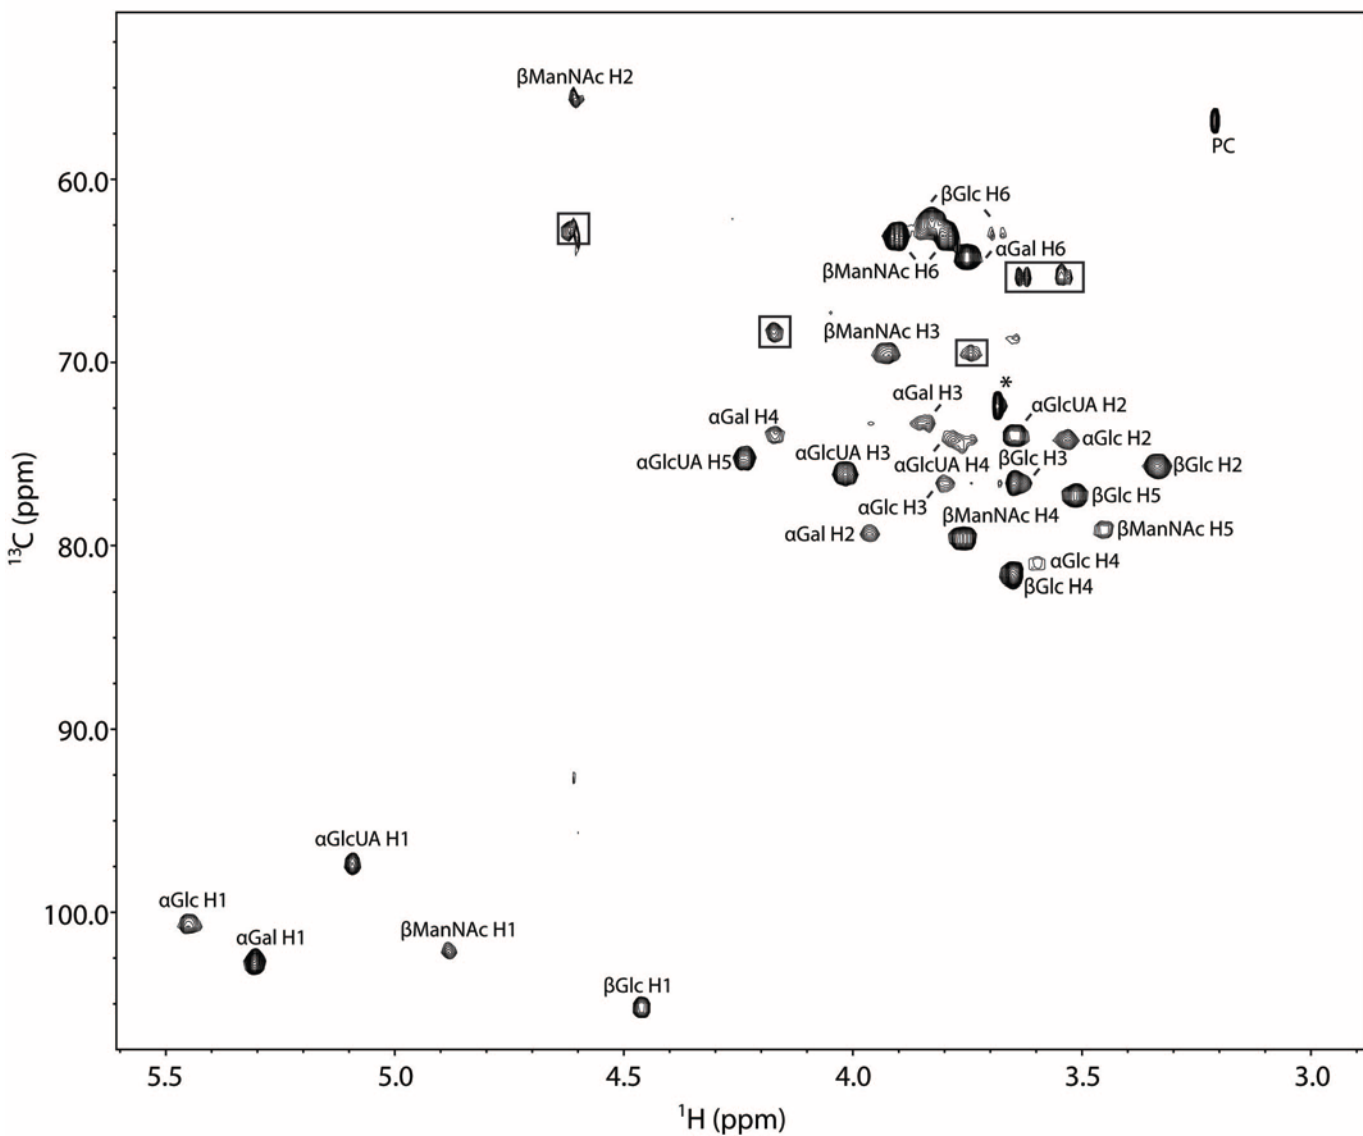

**Figure S2.**  $^1\text{H}$ - $^{13}\text{C}$  HMQC spectra of 9VdO. Boxed signals have not been assigned. Asterisk indicates trace amounts of Tris; PC, chemical shift assigned to phosphocholine on cell wall PS that was co-isolated during capsule PS purification; Gal, galactose; Glc, glucose; GlcUA, glucuronic acid; ManNAc, N-acetyl-mannosamine.
