# Supplementary material
Source: PubMed Central journal article supplement (PMC3340191)
Supplement: supp_M112.346924_jbc.M112.346924-4.pdf [file supp_M112.346924_jbc.M112.346924-4.pdf]

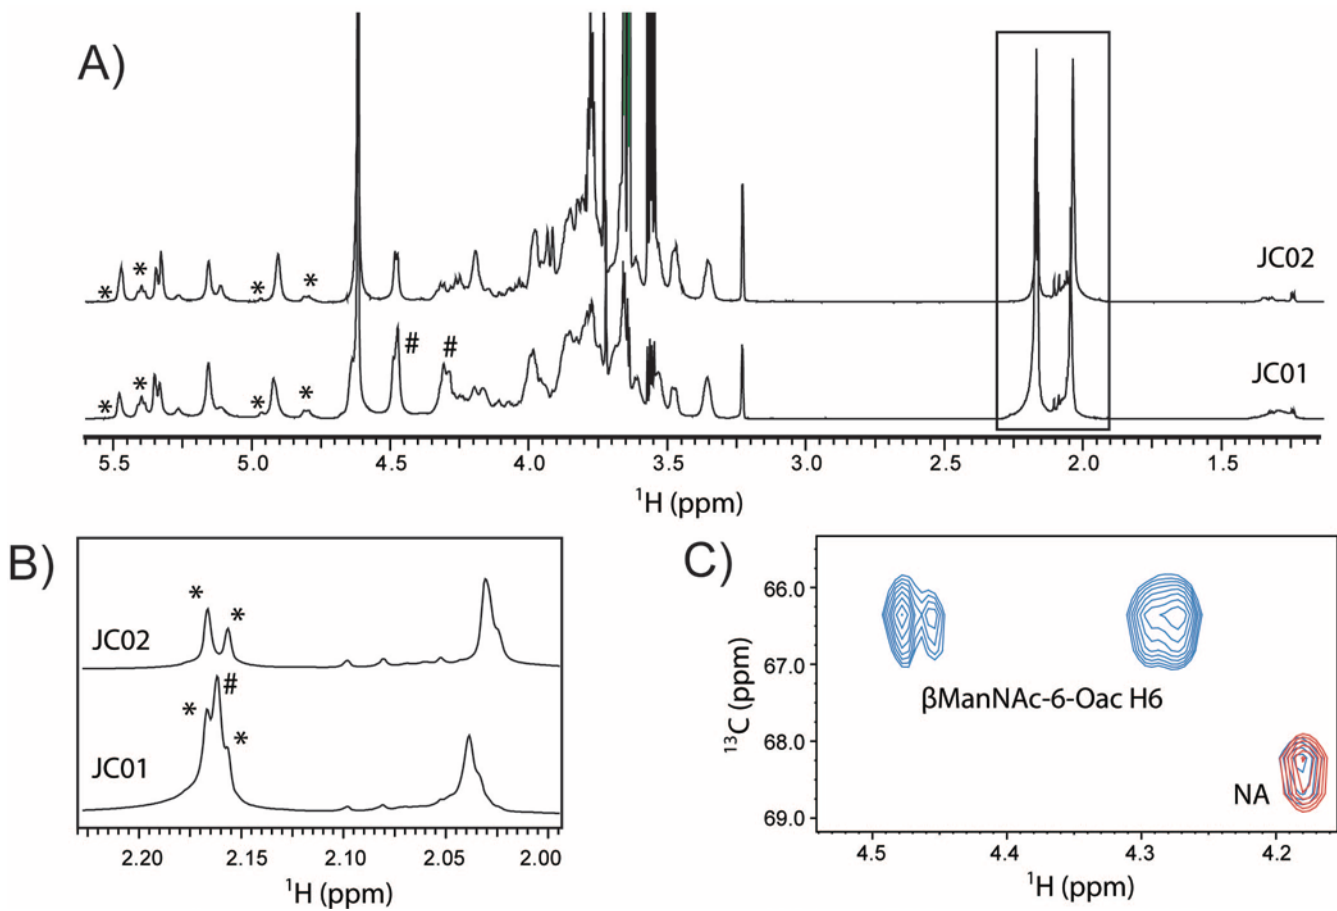

**Figure S3. NMR spectra of JC01 (9V) and JC02 (9A) capsule PS.** A)  $^1\text{H}$  NMR spectra of JC01 and JC02. The area highlighted by the rectangle is enlarged in B. Asterisks in A and B denote signals that are associated with O-acetylation in both JC01 and JC02, while pound signs denote O-acetylation-associated signals present only in JC01. C) An overlay of the  $^1\text{H}$ - $^{13}\text{C}$  HMQC spectra of JC01 (blue) and JC02 (red). NA, not assigned.
