# Supplementary material
Source: PubMed Central journal article supplement (PMC3340191)
Supplement: supp_M112.346924_jbc.M112.346924-5.pdf [file supp_M112.346924_jbc.M112.346924-5.pdf]

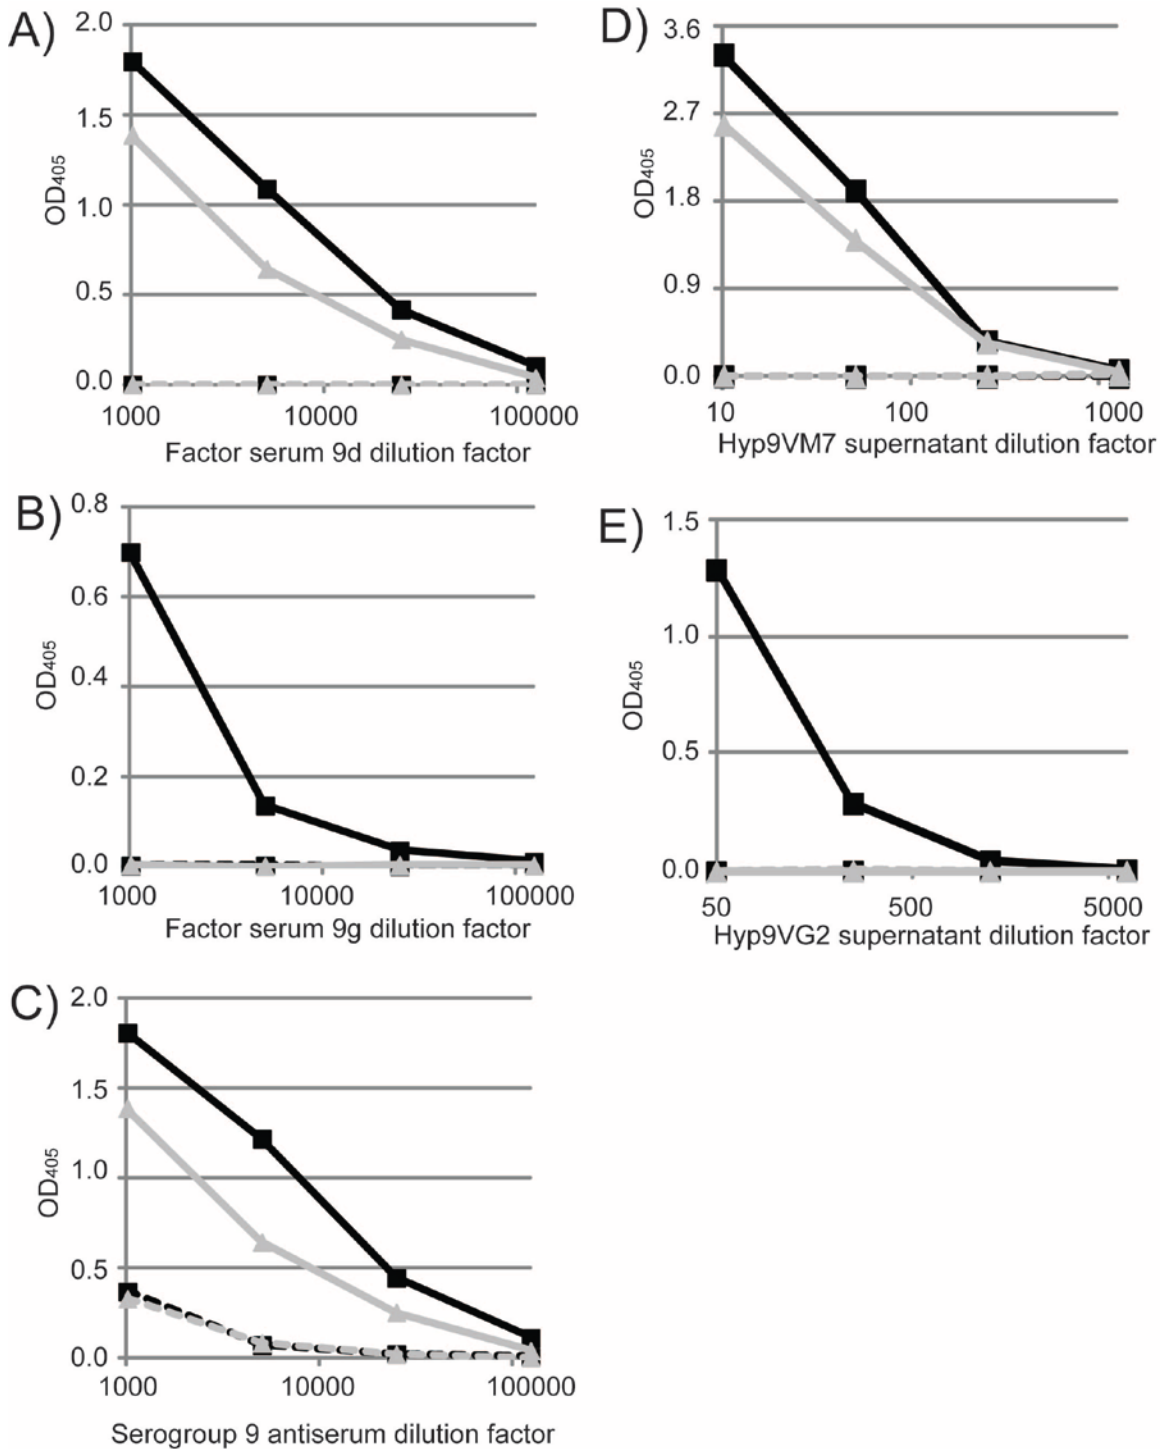

**Figure S4. Dose-dependent binding of serotyping antibodies to 9V (black square, solid line), 9A (gray triangle, solid line), 9VdO (black square, dotted line), and 9AdO (gray triangle, dotted line) PS-coated plates. Each graph depicts five-fold serial dilutions of factor serum 9d (A), factor serum 9g (B), serogroup 9 typing serum (C), Hyp11AM7 hybridoma supernatant (D), and Hyp9VG2 hybridoma supernatant (E).**
