# Supplementary material
Source: PubMed Central journal article supplement (PMC3340191)
Supplement: supp_M112.346924_jbc.M112.346924-6.pdf [file supp_M112.346924_jbc.M112.346924-6.pdf]

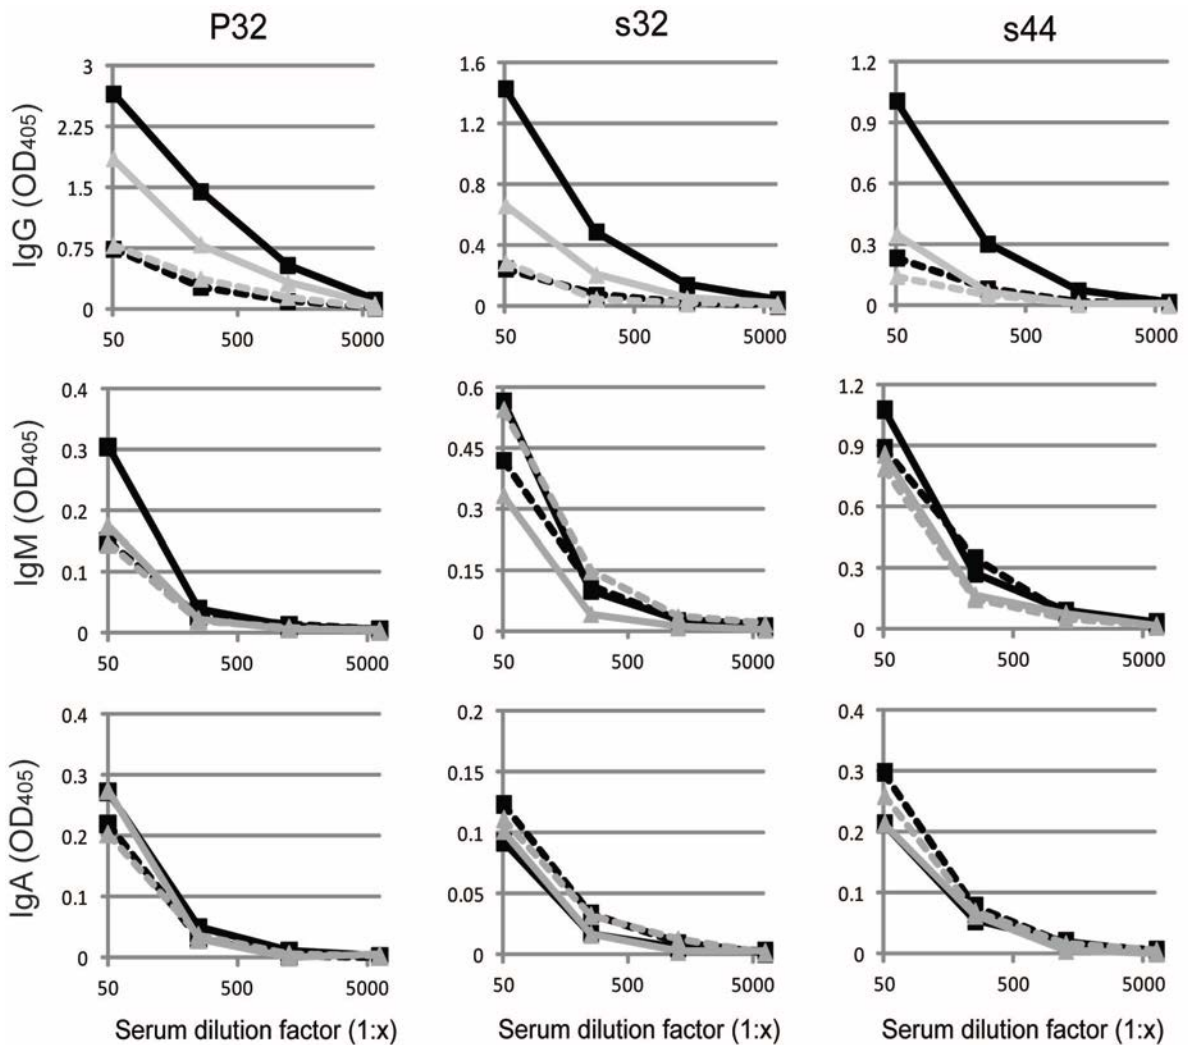

**Figure S5. Dose-dependent binding of human serum antibodies to 9A and 9V capsule PS.** Plates coated with 9V (black square, solid line), 9A (gray triangle, solid line), 9VdO (black square, dotted line) and 9AdO (gray triangle, dotted line) PS were incubated with 5-fold serial dilutions of human serum samples, and the amount of bound IgG (first row), IgM (second row) and IgA (third row) were determined according to OD<sub>405</sub>.
